# Supplementary material for: Genome-wide and protein kinase-focused RNAi screens reveal conserved and novel damage response pathways in Trypanosoma brucei
Source: PLoS Pathog. 2017 Jul 24;13(7):e1006477. doi: 10.1371/journal.ppat.1006477 (PMC5542689; doi:10.1371/journal.ppat.1006477)
Supplement: S4 Table — Worksheet 1 shows all protein kinase (PK) genes examined (tritrypDB IDs provided), detailing the ratio of reads in Tet-induced cells treated with either 0.0002% or 0.0003% MMS relative to Tet-induced cells not exposed to MMS cells (TM2/TM0 and TM3/TMO, respectively); ratios are shown after 2, 3, 4 or 5 days growth (parentheses). For comparison, read depth ratios are also shown in Tet-induced, MMS treated cells relative to MMS treated cells without Tet induction (TM2/CM2 and TM3/CM3, respectively). Cells are coloured as follows: black = ratios below detection; blue = ratios between the minimum detectable level and 0.3; green = ratios between 0.3–0.6; white = ratios of 0.6 or above; red = ratios above 1.0. The final columns provide a colour coding summary of any read changes in days 1, 2, 3, 4 and 5 relative to day 0 (pre- RNAi induction) in the absence of Tet or MMS addition (tp 1–5, control progression), and in Tet-induced cells without MMS at days 2, 3, 4 and 5 relative to day 1 post-induction (tps 2–5, -MMS); colours correspond to the same fold changes as above. Worksheet 2 describes PK genes predicted to display elevated loss of reads after RNAi in the presence of MMS relative to its absence. Worksheet 3 compares the kinome-focused MMS RITseq ratios with those seen in the whole genome MMS RITseq, detailing the PK class, name (if available) and a commentary on experimental validation of predicted damage-associated PKs. (XLSX) [file ppat.1006477.s004.xlsx]

## Sheet: Kinome
																							Control progression						Tet progression (-MMS)
Gene ID		TM2/TM0(2)	TM2/TM0(3)	TM2/TM0(4)	TM2/TM0(5)	2	TM3/TM0(2)	TM3/TM0(3)	TM3/TM0(4)	TM3/TM0(5)	3	TM2/CM2(2)	TM2/CM2(3)	TM2/CM2(4)	TM2/CM2(5)	4	TM3/CM3(2)	TM3/CM3(3)	TM3/CM3(4)	TM3/CM3(5)	5		tp1	tp2	tp3	tp4	tp5		tp2	tp3	tp4	tp5
Tb927.1.1000		0.84101	0.842587	0.948296	1.325		1.1293	0.891267	0.805233	0.78071		1.27335	1.05952	1.46229	1.36007		1.35608	1.45058	1.09972	1.47658		Tb927.1.1000
Tb927.1.1530		0.656425	1.1385	1.57091	0.911188		1.25794	1.43025	0.530812	1.50955		0.727708	0.561753	1.47243	0.936464		0.94926	1.00806	0.423937	-1		Tb927.1.1530			*
Tb927.1.1930		0.721984	0.535457	0.391244	0.409664		0.850116	0.298168	0.291174	0.198529		0.499775	0.278917	0.110479	0.114035		0.448919	0.167077	0.0952662	0.0489384		Tb927.1.1930								*		*
Tb927.1.3130		0.674295	0.909579	0.931861	0.890994		1.05179	1.06405	0.949899	1.13992		1.11315	1.14099	1.51507	1.2939		1.52827	1.23484	1.24739	2.04316		Tb927.1.3130
Tb927.10.10350		0.417323	1.10779	0.994307	1.8927		1.14522	1.44022	1.34537	1.01298		1.18531	0.984665	1.26283	1.07758		1.62903	1.37277	0.800605	1.07556		Tb927.10.10350			*		*			*		*
Tb927.10.1070		0.808928	1.12048	4.24361	1.10488		1.31031	1.93816	5.50767	2.37978		0.509186	0.230552	0.165217	0.159177		0.726106	0.436626	0.322195	0.2445		Tb927.10.1070								*	*	*
Tb927.10.10870		0.893331	1.1166	1.04224	1.73012		1.1038	1.07408	1.35467	2.45996		1.44739	1.23716	0.971082	1.23519		1.42483	1.21242	1.17435	1.6296		Tb927.10.10870
Tb927.10.11940		0.97932	0.814879	0.999211	1.11326		1.25711	0.879036	0.89739	0.944553		1.32523	1.39676	1.80602	1.40202		1.44433	1.20819	1.00145	1.3074		Tb927.10.11940
Tb927.10.12040		0.57533	0.844061	0.872954	0.903606		0.820551	0.9529	0.901425	0.852461		1.44299	1.65937	1.49028	1.13003		1.19467	1.38233	1.29881	1.27654		Tb927.10.12040
Tb927.10.13010		0.984885	0.754779	0.766639	0.723633		1.0597	0.610459	0.357742	0.30102		1.01989	0.958295	0.964813	1.04869		0.944655	0.864964	0.584988	0.529465		Tb927.10.13010
Tb927.10.13480/10.13490		0.790426	1.08064	1.10248	0.761017		1.02108	1.14305	1.1188	0.772296		1.20656	1.22303	1.20808	1.53005		1.08098	1.40845	1.74267	1.05795		Tb927.10.13480/10.13490
Tb927.10.13780		0.870695	0.945455	1.93893	0.968992		1.62675	1.6341	2.65649	0.852713		0.506183	0.0825782	0.0379728	0.0331575		0.66235	0.146897	0.0506823	0.0187202		Tb927.10.13780								*	*	*
Tb927.10.1380		0.868984	1.14084	0.989538	1.32103		0.92849	1.25434	1.06629	1.06921		1.21429	1.30536	1.54056	1.48814		1.0683	1.31643	1.43731	1.34815		Tb927.10.1380
Tb927.10.14300		0.835706	0.866479	0.405058	0.188287		0.855801	0.95821	0.39163	0.0809167		0.917657	0.545989	0.163477	0.085445		0.810837	0.576526	0.163153	0.0250701		Tb927.10.14300										*
Tb927.10.14420		0.799012	1.19004	1.12511	0.864765		0.88266	1.15709	1.50736	1.0515		0.806088	0.901335	0.91597	0.928548		0.877785	0.755172	1.05262	1.01037		Tb927.10.14420
Tb927.10.1460		0.755309	0.729814	0.769032	7.92063		0.860258	0.507366	0.404332	5.09091		-1	-1	0.761555	1.2623		-1	0.205219	-1	-1		Tb927.10.1460	XX	XX	XX	XX	XX		XX	XX	XX	XX
Tb927.10.14770		0.672081	0.550714	0.91226	0.597756		0.975192	0.7844	0.658368	0.547276		1.08589	0.427827	0.140581	0.0453358		1.11395	0.524029	0.157546	0.0443596		Tb927.10.14770										*
Tb927.10.14780		0.45	1.01887	1.16501	2.23993		0.806452	1.27992	2.76938	2.88596		-1	-1	-1	1.22915		-1	0.951735	1.68034	0.977757		Tb927.10.14780		XX	XX				XX		*	*
Tb927.10.14800		0.824025	1.12014	1.16381	0.729487		1.05036	1.29189	1.11503	1.00319		1.07597	1.31762	1.37605	0.849895		1.17022	1.27858	1.40127	1.30983		Tb927.10.14800
Tb927.10.15020		0.570015	1.40351	1.07865	0.960545		1.23907	1.32937	0.977384	1.19303		1.06141	1.57231	1.49169	1.15476		1.05826	1.51705	1.7846	2.34458		Tb927.10.15020
Tb927.10.15300		0.283572	3.08781	1.26496	0.935484		1.62894	2.44086	3.81065	2.55091		0.266825	0.538001	0.141956	0.282238		0.699049	0.461851	0.253655	0.269894		Tb927.10.15300								*	*	*
Tb927.10.15880		0.843778	0.945778	0.926029	0.886428		0.93133	0.962982	0.941515	0.841201		1.17792	1.18155	1.46913	1.32398		1.02463	1.38813	1.34119	1.28193		Tb927.10.15880
Tb927.10.16030		0.391675	1.28703	0.892637	1.57941		0.822182	1.55294	1.00849	2.22351		1.52675	1.64026	0.758368	0.582568		1.05692	1.49457	0.77806	1.54085		Tb927.10.16030			*					*
Tb927.10.16160		0.702982	1.03061	1.14095	0.984147		0.93161	0.9527	1.28829	1.14492		1.09057	1.30383	1.36568	1.41045		1.05801	1.12626	1.78323	1.53382		Tb927.10.16160
Tb927.10.1910		0.525826	0.397059	0.532609	0.521936		0.626561	0.772794	0.543478	1.02849		0.753521	0.408925	0.924482	0.93028		0.647351	-1	-1	0.746415		Tb927.10.1910			*		XX
Tb927.10.1940		0.747096	0.960795	0.883652	1.08957		1.14701	0.969196	0.713799	0.909174		1.09496	1.00348	0.805648	0.884605		0.960136	1.04847	0.761905	0.647328		Tb927.10.1940
Tb927.10.2040		0.972716	0.423563	0.421836	-1		1.48311	2.31767	0.36193	-1		0.573445	0.113167	0.0816131	0.160237		0.646193	0.479871	0.111974	-1		Tb927.10.2040								*	*	*
Tb927.10.2390		0.678342	1.00903	1.13766	0.90067		0.765598	0.808498	1.05321	0.938192		1.49124	1.3408	1.79992	1.693		1.22242	1.01092	2.3099	1.97966		Tb927.10.2390
Tb927.10.3230		0.707899	1.18028	1.09849	1.60542		1.10849	1.09637	1.09892	1.04189		1.3726	1.68747	2.30352	2.1791		1.36082	1.63333	2.00842	1.68128		Tb927.10.3230
Tb927.10.3340		0.638661	1.14864	1.00043	1.15353		0.958787	1.05383	1.09687	1.01106		1.29538	1.4537	1.35307	1.06381		0.932944	1.44443	1.33522	1.28214		Tb927.10.3340
Tb927.10.350		0.582168	0.857143	0.927321	1.35653		1.02316	0.987398	1.1256	1.16146		1.39301	1.18456	1.21231	1.82693		1.08363	1.25846	1.3198	1.60265		Tb927.10.350
Tb927.10.3900		0.814636	0.855115	0.923486	0.537778		1.1925	1.22332	1.42914	1.21111		0.836192	0.575235	0.366182	0.130813		0.953092	0.956241	0.363447	0.117492		Tb927.10.3900										*
Tb927.10.460		0.619174	0.997313	1.16373	1.06317		0.532618	0.865991	1.0478	0.819286		1.12889	1.47208	1.31589	1.638		0.715922	1.38625	0.90982	1.4741		Tb927.10.460
Tb927.10.4940		0.695199	0.535988	1.21176	0.680982		2.41733	0.733538	1.4186	0.631206		0.137979	0.0456026	0.0175738	0.0209711		0.194488	0.0671445	0.0199479	0.00828455		Tb927.10.4940								*	*	*
Tb927.10.4990		-1	2.15086	1.62931	0.504202		-1	1.53053	0.858238	0.405694		0.0978178	0.0661201	0.0297872	0.0523782		0.0652776	0.0413728	0.0144359	0.0260941		Tb927.10.4990							*	XX	*	*
Tb927.10.5140		1.33616	-1	-1	-1		1.45904	-1	-1	2.03798		0.238411	-1	0.0565075	-1		0.262164	-1	-1	0.0919037		Tb927.10.5140								*	XX	XX
Tb927.10.5270		0.298683	2.64685	0.769	6.06481		0.876802	2.20583	0.989	0.977938		0.70449	0.624148	0.577386	1.5246		1.05437	0.927969	0.750949	0.334086		Tb927.10.5270								*	*
Tb927.10.5310		0.714805	1.34394	0.966819	0.934759		0.80124	1.13137	0.943863	0.670547		1.22912	1.4303	1.33136	1.74924		0.873824	1.02682	1.20079	0.985674		Tb927.10.5310
Tb927.10.5950/927.10.5940		0.87878	1.16891	1.21555	1.41414		0.938842	1.21013	1.58884	2.01549		1.23841	1.7353	1.73624	1.64482		1.17452	1.91769	2.84255	3.03045		Tb927.10.5950/927.10.5940				*	*				*	*
Tb927.10.7780		0.979547	1.03391	3.40351	0.769231		1.19071	1.19537	2.01053	1.14773		0.911747	0.631492	0.268996	0.127129		0.720699	0.607744	0.192811	0.0741557		Tb927.10.7780								*		*
Tb927.10.8420		0.949655	0.820234	1.34247	1.10553		1.12995	1.40443	1.67742	1.07538		0.436936	0.138893	0.0635495	0.0484832		0.436645	0.157732	0.0855576	0.0500702		Tb927.10.8420								*	*	*
Tb927.10.8730		1.24742	0.846594	1.04443	0.77077		1.04269	0.98147	1.02361	0.648308		1.12224	1.02464	1.35835	0.917513		1.08212	1.1463	1.11229	0.714061		Tb927.10.8730
Tb927.10.9600		0.530921	0.833019	1.19652	0.928802		0.939563	0.916374	0.830496	0.837622		1.00563	0.983126	1.31771	1.59432		1.09597	1.18442	0.924007	1.17939		Tb927.10.9600
Tb927.10.9900		0.772783	1.23493	0.824578	0.863276		0.807506	1.14128	0.98346	0.846002		1.0525	1.07522	0.999012	1.01872		1.1539	1.13748	1.33191	1.19524		Tb927.10.9900
Tb927.11.10520		0.291005	1.08547	0.709591	4.15132		0.628229	1.05422	0.409548	2.38816		0.170538	0.118699	0.129976	0.280125		0.156624	0.0927402	0.0516804	0.123921		Tb927.11.10520								*	*	*
Tb927.11.1180		0.763097	0.884253	1.00491	0.554813		0.880473	0.756453	0.729529	0.181818		0.83901	0.517913	0.291163	0.239325		0.896736	0.398599	0.156425	0.0508809		Tb927.11.1180										*
Tb927.11.11110		0.652404	0.744541	0.699538	0.789639		0.92203	0.675609	0.603822	0.558441		1.31197	0.971925	1.13966	1.11412		1.29649	1.35852	1.07829	1.28428		Tb11.01.2900					*				*	*
Tb927.11.12410		0.918633	-1	-1	-1		1.19358	-1	-1	-1		0.42756	-1	-1	-1		0.484047	-1	-1	-1		Tb927.11.12410								*	XX	XX
Tb927.11.12420		0.527606	0.654387	0.758135	0.903373		1.14837	1.10082	0.830015	0.662716		1.01099	0.61412	0.451678	0.319373		1.02539	1.2329	0.448523	0.205658		Tb927.11.12420								*		*
Tb927.11.14070		0.884592	0.423098	2.78808	1.11662		0.712707	0.229484	1.6787	0.780325		0.904015	0.363497	0.595	0.683418		0.721787	0.411244	0.377541	0.193448		Tb927.11.14070										*
Tb927.11.14270		0.856524	1.23127	1.21128	1.15939		1.61786	1.02094	1.01787	1.47362		1.50275	1.21879	2.44311	1.88774		1.47154	1.32746	1.5347	2.32331		Tb927.11.14270
Tb927.11.14500		0.591369	0.960789	1.52649	1.10649		0.946307	1.01897	1.59092	2.16075		1.28837	0.921845	1.14219	0.750055		0.966122	1.02182	1.56689	1.70399		Tb927.11.14500
Tb927.11.14680		0.665956	0.948436	0.9	0.385224		1.01598	1.28273	0.753394	0.430079		0.872532	0.168622	0.0461366	0.031665		0.67065	0.170135	0.0343866	0.0206237		Tb927.11.14680									*	*
Tb927.11.15010		0.777914	1.09056	1.09876	1.11126		0.823282	1.02967	1.33522	1.75243		1.09026	1.10362	1.19982	1.11246		1.13614	1.1032	1.14335	1.11717		Tb927.11.15010			*		*				*	*
Tb927.11.16790		0.681865	1.34752	1.6474	0.87858		0.904313	1.30521	2.52732	1.94731		0.781003	0.711933	0.437416	0.377722		0.688629	0.898639	0.696901	0.566103		Tb927.11.16790									*	*
Tb927.11.2040		-1	-1	-1	-1		-1	-1	-1	-1		-1	-1	-1	-1		-1	-1	-1	-1		Tb927.11.2040	XX	XX	XX	XX	XX			XX	XX	XX
Tb927.11.3140		0.522783	1.30896	1.67459	0.708207		0.987719	1.06525	1.48251	0.851986		0.859348	0.824257	0.910973	0.401815		1.34315	0.599712	0.825941	0.637209		Tb927.11.3140								*	*	*
Tb927.11.4470		0.532022	1.09107	0.924855	1.85417		1.0686	0.855157	0.792559	1.10417		0.861694	0.791807	0.232366	0.0819165		1.18854	0.506938	0.186077	0.0502633		Tb927.11.4470										*
Tb927.11.4780		0.751145	1.49722	0.952839	0.856913		1.1471	0.769129	0.813841	0.760407		1.10095	1.43996	1.32368	1.64365		1.21761	0.902593	1.33142	1.42739		Tb927.11.4780
Tb927.11.5340		0.57158	0.419134	1.13684	1.00866		0.746474	1.4123	0.915789	0.638889		0.318606	0.0288401	0.0193741	0.0446617		0.2474	0.095165	0.0243342	0.01662		Tb927.11.5340								*	*	*
Tb927.11.5860		1.15237	0.971875	0.792782	0.764019		1.86478	0.570115	0.761111	0.82243		1.30814	0.454305	2.16879	1.20221		1.61706	0.530239	1.27616	1.13548		Tb927.11.5860							*
Tb927.11.6690		0.74485	1.2832	1.00895	0.899392		0.915743	1.11851	0.969381	1.05181		1.2074	1.47121	1.80091	1.48236		0.994544	1.18081	1.71897	1.99883		Tb927.11.6690										*
Tb927.11.6990		0.47578	0.979379	0.980807	1.48362		0.997494	0.799677	1.04608	1.05673		1.56918	1.04896	0.933681	2.53939		0.881818	0.921445	1.32531	1.25824		Tb927.11.6990								*
Tb927.11.7010		0.534171	0.877803	0.545872	0.536877		0.785291	0.967963	0.394332	0.372051		1.21891	0.675268	0.535684	0.990634		1.45098	1.04708	0.342602	0.425873		Tb927.11.7010
Tb927.11.7210		0.768989	0.884537	1.02889	1.27821		0.841797	0.949305	0.677403	1.29825		1.47825	1.35795	2.08836	1.31575		0.816995	1.58388	1.27766	1.14125		Tb927.11.7210
Tb927.11.790		0.441821	1.07247	0.783554	0.591885		0.671538	0.839152	0.568433	0.635016		1.27607	2.06961	1.27364	1.17968		0.825348	1.46754	1.46015	1.69015		Tb927.11.790
Tb927.11.8150		0.450401	0.747837	0.661052	1.23219		0.679359	0.543057	0.43871	1.04684		1.59397	0.983014	0.866221	1.45728		0.633941	0.88749	1.21954	1.26567		Tb927.11.8150							*	*	*	*
Tb927.11.8170		0.414777	1.34081	1.60448	1.02587		0.773298	1.21554	1.38467	0.849894		0.867669	0.667189	1.75471	0.760336		1.30824	1.24727	0.866299	1.26199		Tb927.11.8170		*	*	*	*			*	*	*
Tb927.11.8220		0.697706	1.36656	-1	1.88362		-1	-1	-1	1.09574		0.185371	0.140984	0.0282017	0.0335074		-1	-1	-1	0.019695		Tb927.11.8220								*	*	XX
Tb927.11.850		0.827158	1.10979	2.51847	0.880309		0.912359	1.64244	5.50318	3.65251		0.726654	0.244503	0.136903	0.053532		0.788296	0.385131	0.277047	0.12916		Tb927.11.850									*	*
Tb927.11.8940		0.546774	0.654687	0.913183	0.839676		1.03709	0.918629	1.12872	0.667125		0.991953	0.945374	0.869464	1.11147		1.15581	1.40466	1.38956	0.801452		Tb927.11.8940									*
Tb927.11.9190		0.497467	0.929042	1.16558	0.527273		0.727108	0.941707	0.811526	0.553247		0.803233	0.584784	0.236103	0.102785		0.955652	0.411502	0.133503	0.0670233		Tb927.11.9190										*
Tb927.11.9270		1.13956	1.57529	1.16026	1.05536		1.5439	1.30769	0.930034	0.867048		1.24541	1.24335	1.59767	2.03721		1.09459	1.54301	1.10101	0.887971		Tb927.11.9270
Tb927.11.9290		0.489867	1.10069	1.41728	1.13009		0.907216	1.34594	1.01303	1.09218		1.08537	1.12754	1.18172	0.518456		1.29481	0.7366	0.863233	0.771973		Tb927.11.9290								*
Tb927.2.1820		0.898556	0.659373	0.820635	0.256757		1.27512	1.02948	1.2549	0.472949		0.76891	0.431381	0.113952	0.0364327		0.73765	0.424443	0.130293	0.0758679		Tb927.2.1820								*	*	*
Tb927.2.2120		0.914081	0.81186	0.986153	1.53983		1.16578	0.792544	1.16109	1.39443		1.32172	0.978209	0.952188	1.37476		1.37393	1.05796	1.21292	1.39817		Tb927.2.2120
Tb927.2.2260		0.656901	0.981428	0.841649	0.653151		1.77957	0.895171	0.390928	0.382022		0.789019	1.43947	0.692818	0.720755		1.19077	1.05291	0.50533	0.352411		Tb927.2.2260
Tb927.2.2430		0.674783	1.14632	1.68155	1.46207		0.981139	0.768528	1.65923	1.55172		0.906271	1.24156	0.338519	0.111146		1.12258	0.568782	0.44511	0.107604		Tb927.2.2430										*
Tb927.2.2720		0.829223	0.853162	1.14222	1.27179		1.24375	0.998788	0.734324	0.826715		0.917271	0.833767	1.25166	1.02366		0.898285	1.0805	0.958149	0.507059		Tb927.2.2720
Tb927.2.4200		0.0710861	1.32814	0.991937	0.911033		1.0944	0.95225	1.07257	0.796437		1.31639	1.70372	1.69398	1.28781		1.33535	1.071	1.87293	1.51255		Tb927.2.4200								*
Tb927.2.4510		0.645296	1.15044	1.6875	0.666667		1.2198	1.9823	1.44792	0.670886		0.248299	0.0378675	0.047619	0.0479287		0.272594	0.0671664	0.02999	0.0158099		Tb927.2.4510								*	*	*
Tb927.2.5230		0.776898	1.10329	0.896285	0.935652		1.01638	1.16005	0.944171	0.893066		0.989759	1.30567	1.49384	1.45404		1.18819	1.31674	1.47442	1.48436		Tb927.2.5230
Tb927.3.1570		0.692226	0.63931	0.947538	0.988554		0.998468	0.893207	1.06586	0.968128		1.12732	1.03423	1.41499	1.30718		1.23657	1.28497	1.21019	1.40926		Tb927.3.1570
Tb927.3.1610		0.586102	0.852891	0.85165	1.06027		0.867903	0.779854	0.924918	1.28531		1.09971	1.27284	1.1151	1.07892		0.942182	1.15233	1.37672	1.48528		Tb927.3.1610
Tb927.3.1630		0.597553	0.967197	1.09169	1.06133		1.06278	0.731498	0.611612	0.708999		0.926521	1.4353	1.75574	1.13331		0.785991	1.01672	1.16106	1.27522		Tb927.3.1630			*	*	*				*	*
Tb927.3.1850		1.00926	1.14073	1.05562	0.832358		1.14571	1.17791	1.15163	0.879767		0.983299	1.23357	1.54978	0.943982		1.0742	1.3582	1.45708	1.31661		Tb927.3.1850
Tb927.3.2060		0.592485	1.17913	1.27503	0.679764		0.775123	0.891832	1.00533	0.963795		0.987326	1.41361	1.40958	1.34548		0.766294	0.930719	1.16571	1.11434		Tb927.3.2060
Tb927.3.2440		0.676063	0.781971	0.952276	1.22222		1.19706	1.21582	1.43833	0.853175		1.38819	0.369378	0.0615894	0.0593506		1.22472	0.532704	0.131454	0.0375665		Tb927.3.2440									*	*
Tb927.3.2690		0.729768	0.852403	1.03364	0.824658		0.997453	0.826087	0.83954	0.729154		1.18111	1.34154	1.32949	1.22647		1.17612	1.2343	1.38821	1.75856		Tb927.3.2690
Tb927.3.3080		0.782385	1.05203	1.06488	1.40888		0.936569	1.1074	1.01221	1.24781		1.43699	1.34538	1.7221	1.62024		1.22595	1.77812	1.72288	2.06091		Tb927.3.3080
Tb927.3.3190		0.787701	0.940286	0.954212	1.10355		1.14481	1.08062	0.952562	1.06137		1.26307	1.44087	1.61966	1.83406		1.12958	1.89156	1.78689	2.0696		Tb927.3.3190
Tb927.3.3290		0.720087	1.04182	0.830345	0.730295		0.946841	0.922693	0.590629	0.574178		1.12068	1.03411	0.939169	0.365173		0.918603	1.07211	0.577461	0.235914		Tb927.3.3290
Tb927.3.3920		0.528761	0.98274	0.879514	0.50807		0.692001	0.848328	0.526993	0.291636		0.927044	0.6509	0.45088	0.288949		1.04228	0.770527	0.356485	0.13584		Tb927.3.3920
Tb927.3.4560		0.672711	0.758523	0.805233	0.723343		1.07233	0.763636	0.815771	0.315041		0.966942	1.11157	0.649219	0.660194		1.09653	0.853276	1.43579	0.193992		Tb927.3.4560			*							*
Tb927.3.4670		0.611379	0.950068	1.19988	1.05549		0.969594	0.665298	0.837578	0.872852		1.20523	1.15082	1.65759	1.49463		1.34814	1.12755	1.0703	1.21749		Tb927.3.4670
Tb927.3.4860		0.839949	1.26966	1.85942	1.14107		0.906582	0.529237	2.90234	1.51243		-1	1.1469	0.869085	3.39672		0.598878	0.33871	1.12334	0.56973		Tb927.3.4860	*	XX		*	XX			*	*	*
Tb927.3.5400		0.972878	0.780711	1.59416	1.80189		1.59404	1.87817	3.32349	2.96656		0.764115	0.231871	0.111463	0.103557		0.902851	0.463265	0.313016	0.110753		Tb927.3.5400								*	*	*
Tb927.3.5650		0.621149	0.848372	0.844036	1.03627		1.07136	0.620271	0.751229	0.548763		1.08293	1.3591	1.39429	1.42968		1.38421	1.22008	1.32941	1.22707		Tb927.3.5650
Tb927.3.690		0.589243	0.793084	2.13846	0.857692		0.94129	1.49136	2.13136	1.3		0.728659	0.112779	0.0603334	0.0663265		0.568116	0.19543	0.0615215	0.0378076		Tb927.3.690									*	*
Tb927.4.1700		0.481854	1.20577	0.968507	1.00134		1.00938	1.14751	0.876115	0.689222		0.895484	1.12226	1.23478	0.994266		0.945648	1.23465	0.886055	0.744027		Tb927.4.1700
Tb927.4.2460		0.86386	0.845225	1.1714	1.23299		1.14821	0.770799	1.11162	1.00491		1.0531	1.29797	1.47464	1.56617		1.36173	1.20794	1.20135	1.38911		Tb927.4.2460
Tb927.4.2500		0.27662	1.05321	0.980617	1.3806		0.744332	0.768487	0.811199	0.879836		0.924268	1.54336	1.44321	1.38852		0.953226	0.907073	1.70082	0.927116		Tb927.4.2500
Tb927.4.3420		0.841275	1.26126	1.92736	9.85465		1.23266	2.31157	3.11703	24.3314		1.21139	0.773481	1.08107	0.667849		1.47983	1.29357	1.63677	1.00456		Tb927.4.3420
Tb927.4.3770		0.774022	1.09184	0.947161	1.27033		1.07712	0.801168	1.38082	1.57283		1.49859	1.42506	2.01572	1.82679		1.3864	1.49443	2.0896	1.98242		Tb927.4.3770
Tb927.4.420		0.826719	1.24825	1.62731	0.76378		1.17287	1.48121	1.32454	0.822835		1.0724	0.516587	0.0944377	0.0395865		1.14421	0.498036	0.0695278	0.0222166		Tb927.4.420									*	*
Tb927.4.4590		1.05476	1.14886	1.3908	0.822756		0.91945	1.19089	1.13663	0.870892		1.44855	1.11107	1.36633	1.1539		0.939796	1.23928	1.78992	1.58548		Tb927.4.4590
Tb927.4.4970		0.690612	1.14488	1.23383	0.64138		0.739414	1.22045	0.921578	0.908339		0.762658	1.44933	1.42459	0.980448		0.851687	1.42306	1.1451	1.0951		Tb927.4.4970
Tb927.4.5180/8.7220		0.611413	-1	-1	-1		1.27515	-1	-1	-1		0.334764	-1	-1	-1		0.425229	-1	0.0731988	-1		Tb927.4.5180/8.7220								*	XX	XX
Tb927.4.5310		0.404832	1.6	0.96451	0.645347		0.991215	3.52093	1.97737	1.40722		0.278779	0.0816147	0.0306657	0.0123986		0.309203	0.154018	0.049303	0.0116132		Tb927.4.5310								*	*	*
Tb927.4.5390/8.6930		0.773792	1.02578	0.692138	0.584601		0.758342	0.653803	0.478457	0.35829		1.07787	1.00915	0.900675	0.850136		0.874579	1.01326	0.600516	0.572547		Tb927.4.5390/8.6930
Tb927.4.800		0.797675	1.07994	1.04601	1.16989		0.913275	1.17071	1.11704	1.05881		1.07628	1.30473	1.23326	1.3839		1.10112	1.38498	1.40271	1.49135		Tb927.4.800
Tb927.4.840		0.589835	0.876928	1.19701	1.25362		1.04724	0.920393	0.931935	1.06156		1.16648	1.39938	1.70018	1.32243		1.34097	1.64982	1.20511	1.58398		Tb927.4.840
Tb927.5.1650		0.496844	1.51539	0.958869	0.759384		0.615266	1.51748	1.00086	0.862505		0.460961	2.32314	1.52765	1.33168		0.867286	1.18349	2.38124	1.64091		Tb927.5.1650								*
Tb927.5.2820		0.954796	1.01789	0.885432	0.784493		1.11158	1.15506	0.859136	0.711233		1.07031	1.08767	1.03972	0.961196		1.03776	1.30187	1.13229	0.825475		Tb927.5.2820
Tb927.5.3150		1.11952	1.13004	1.00492	0.98005		0.968432	1.39047	0.922078	0.719514		1.07745	0.921612	1.01283	1.11388		0.949062	1.00152	1.02168	0.917366		Tb927.5.3150
Tb927.5.3160		0.543888	1.04812	0.99355	0.915126		0.737841	0.81109	0.587396	0.76343		0.948498	1.0948	1.78586	1.57131		0.910434	0.872379	0.914274	1.12025		Tb927.5.3160
Tb927.5.3320		0.508227	0.885321	0.930816	0.671499		1.25837	1.22444	0.943806	0.733862		1.05373	1.12766	2.10333	1.09647		1.11049	1.57347	1.39458	1.20382		Tb927.5.3320
Tb927.5.3420		0.882291	1.00576	1.06408	1.0707		1.07319	0.983032	1.23338	1.16626		1.23472	1.40344	1.45328	1.54375		1.01394	1.30964	1.28161	1.41957		Tb927.5.3420
Tb927.5.4430		0.775562	1.14322	1.1292	1.27183		0.918868	1.25795	1.74923	2.17099		1.21848	1.34376	1.40695	1.19909		1.1236	1.57805	1.87367	2.51869		Tb927.5.4430
Tb927.5.790/5.800		0.889086	-1	-1	-1		0.681095	-1	-1	-1		0.595159	0.0567239	-1	-1		0.325591	0.22119	0.0436472	-1		Tb927.5.790/5.800								*	XX	XX
Tb927.6.1780		0.787891	1.00483	0.931688	1.01948		0.840358	0.80259	0.788135	0.476816		1.26046	1.21413	1.28621	1.22577		1.16051	1.02782	0.907504	0.702947		Tb927.6.1780
Tb927.6.2030		0.199697	0.871315	1.97232	1.04982		0.905696	0.858844	0.79588	0.403315		0.75	1.32515	1.10046	1.5261		0.82906	1.19013	0.429837	-1		Tb927.6.2030								*		*
Tb927.6.2250		0.714541	1.06451	1.01635	1.10691		1.04083	1.02162	1.03756	1.0103		1.07786	1.51762	1.55933	1.44408		1.13437	1.23209	1.6312	1.43119		Tb927.6.2250
Tb927.6.2450		0.776517	1.20959	0.896254	0.822584		0.841993	0.769053	0.81974	0.717039		1.18982	1.45289	1.45472	1.70513		1.04609	0.99499	1.55917	1.61681		Tb927.6.2450
Tb927.6.2840		1.08462	0.821635	1.52941	1.07229		1.25417	1.71049	2.68382	2.91566		0.400377	0.124546	0.0573328	0.0232375		0.482886	0.184973	0.0779581	0.0498331		Tb927.6.2840								*	*	*
Tb927.6.2980		0.658083	1.00427	1.35714	1.11527		1.2699	0.849769	1.16075	1.03784		1.17862	1.20346	1.59787	1.06205		1.14052	1.04997	1.15341	1.3101		Tb927.6.2980
Tb927.6.3110		0.571895	0.722745	0.724841	1.01505		1.03813	0.588627	0.638957	0.350993		0.793942	0.568185	0.293619	0.312976		0.724723	0.394046	0.287266	0.0804548		Tb927.6.3110										*
Tb927.6.3430		0.885005	1.13503	1.56177	1.12736		1.31852	1.09429	1.50073	1.0929		1.19059	1.42446	1.49435	1.6614		0.995847	1.43186	1.47872	1.23984		Tb927.6.3430
Tb927.6.4220		1.0582	0.934528	0.822264	0.895462		1.12852	0.767955	0.573498	0.619147		1.12948	0.841404	0.967847	0.968264		0.987561	0.812007	0.595359	0.681326		Tb927.6.4220
Tb927.6.4970		1.42418	0.691508	0.753247	1.15679		1.36635	0.891917	1.17327	1.12506		0.737201	0.18186	0.0613757	0.0970655		0.568284	0.215814	0.131157	0.0870207		Tb927.6.4970								*	*	*
Tb927.6.5100		0.862237	0.960399	0.846757	0.790428		0.936193	1.17225	1.08436	0.69612		1.11162	0.862433	0.481267	0.667595		0.877	1.00295	0.660348	0.290922		Tb927.6.5100
Tb927.7.1900		0.980897	1.14045	0.833586	0.989691		1.21692	0.939469	0.827027	0.994362		1.15642	1.24913	1.36022	1.24783		1.24209	0.99143	1.51401	1.44658		Tb927.7.1900
Tb927.7.2420		0.933994	1.08975	1.09828	0.943493		1.03762	1.1121	1.05745	0.989673		1.21743	1.61929	1.18796	1.80619		1.07043	1.41278	2.1356	1.88803		Tb927.7.2420
Tb927.7.2750		0.400774	1.48227	1.46022	1.93678		1.10406	2.27869	4.1014	5.14943		0.45985	0.390217	0.233287	0.186924		0.495203	0.411649	0.655382	0.285259		Tb927.7.2750								*	*	*
Tb927.7.3190		0.684252	0.993888	1.12353	0.846553		0.861022	0.972426	1.00013	0.908971		0.960747	1.17116	1.49829	1.28481		1.03903	1.23538	1.31925	1.71305		Tb927.7.3190
Tb927.7.3210		0.505487	0.897817	1.25427	0.741997		0.632647	0.779336	0.912653	0.603161		0.727052	0.477617	0.322291	0.200867		0.534939	0.442234	0.327214	0.186118		Tb927.7.3210									*	*
Tb927.7.3580		0.987787	1.26627	1.06749	1.8239		1.10046	1.04628	1.23254	1.09714		1.05146	0.856969	0.688447	0.565646		0.854632	0.74132	0.814887	0.381654		Tb927.7.3580
Tb927.7.3650		0.695525	0.86631	0.846579	0.883546		0.710581	0.993464	0.732682	0.681924		2.2228	1.22315	1.16727	0.975064		0.760519	1.85801	1.04795	0.899847		Tb927.7.3650
Tb927.7.3880		0.785333	1.07796	0.938356	1		1.13789	1.073	1.19453	1.04911		0.824011	0.361193	0.110471	0.0692503		0.813854	0.455065	0.138723	0.0566538		Tb927.7.3880								*	*	*
Tb927.7.4090		0.704395	0.463361	0.86377	0.553289		1.22125	0.746336	0.645876	0.534415		1.00111	0.674455	0.710801	0.569024		1.49863	1.04444	0.528826	0.378794		Tb927.7.4090
Tb927.7.5220		0.538681	1.02108	1.10303	1.04817		0.925161	0.987034	1.13405	0.891622		1.07632	1.50757	1.18529	1.33312		1.19799	1.15552	1.55433	1.02618		Tb927.7.5220
Tb927.7.5770		0.504637	0.579306	0.788656	0.277003		1.03505	0.791695	1.09091	0.762963		0.842972	0.255096	0.148974	0.0341129		1.02538	0.316306	0.240736	0.104569		Tb927.7.5770										*
Tb927.7.6220		0.781061	0.876657	1.68182	3.10345		1.53732	0.772727	2.41414	3.56897		1.25289	0.73489	0.197158	0.15887		0.980617	1.18617	0.300629	0.079334		Tb927.7.6220				*						*
Tb927.7.6310		-1	-1	-1	-1		-1	-1	-1	-1		-1	-1	-1	-1		-1	-1	-1	-1		Tb927.7.6310				*	*			XX	XX	*
Tb927.7.6680		0.725	1.55952	1.52101	1.51576		1.42417	1.30597	0.691176	0.604213		-1	0.632593	-1	1.39762		-1	-1	-1	-1		Tb927.7.6680	XX	XX	XX	XX	XX		XX	XX	XX	XX
Tb927.7.7360		0.697876	0.704082	0.876093	0.856		1.26771	1.00196	0.687196	1.864		0.344888	0.0819088	0.0667076	0.0429114		0.401802	0.162286	0.0628894	0.0337779		Tb927.7.7360								*	*	*
Tb927.7.960		0.721528	0.853768	0.61985	0.361055		0.772321	0.708915	0.391429	0.27633		0.721997	0.504036	0.391937	0.161099		0.691761	0.407729	0.229241	0.124937		Tb927.7.960
Tb927.8.1100		0.683499	1.62736	0.691057	1.21355		0.924256	2.61321	1.2581	0.759754		1.03129	0.395654	0.185714	0.455263		0.461864	0.600104	0.64974	0.511757		Tb927.8.1100								*	*
Tb927.8.1670		0.896702	1.11565	1.03215	1.00726		1.02805	1.22232	0.911781	1.05528		1.39279	1.43385	1.17265	1.16275		1.13339	1.53425	1.40577	1.32919		Tb927.8.1670
Tb927.8.1690/8.1690		0.609631	1.23346	1.20121	0.793746		0.946995	1.10272	1.63866	1.04961		0.733641	1.12411	0.736829	0.803653		1.00689	1.05934	0.839737	0.950378		Tb927.8.1690/8.1690										*
Tb927.8.1780		0.775203	1.09897	1.12692	1.86933		1.16046	1.17073	0.908645	1.19222		1.164	1.17026	2.28755	1.03902		1.23137	1.31502	1.23295	1.02722		Tb927.8.1780
Tb927.8.3550		0.680723	0.913864	0.824898	1.06325		1.1825	0.522847	0.673066	0.559496		1.01666	1.04414	0.930141	0.788133		0.933104	0.577886	0.721772	0.511256		Tb927.8.3550								*
Tb927.8.3770		0.849138	0.880219	0.989235	0.992506		1.42457	0.811114	0.889122	0.69851		1.18982	1.35752	1.4511	1.11493		1.57224	0.995758	1.15389	0.889037		Tb927.8.3770
Tb927.8.4000		0.732058	1.01586	0.885248	1.19135		1.00357	0.857569	0.814231	0.731719		1.19155	1.16922	1.04918	1.10559		1.09299	1.06834	0.909018	0.997038		Tb927.8.4000
Tb927.8.4260		0.623815	0.68069	0.826274	1.15929		1.19046	0.63798	0.610026	0.673982		1.11743	1.17683	1.35831	1.28781		1.13644	1.05672	0.87077	0.828547		Tb927.8.4260
Tb927.8.5390		0.887175	0.823899	0.945726	0.98976		1.04384	0.877307	0.865133	0.765746		1.23066	0.889053	1.69219	1.2329		1.11143	1.31983	1.34479	1.42314		Tb927.8.5390
Tb927.8.5500		0.785472	1.02808	0.961556	0.74387		0.911066	0.830521	0.708665	0.555196		1.11508	1.11171	0.99935	1.1847		1.1561	1.16378	0.876975	0.507496		Tb927.8.5500
Tb927.8.5730		-1	-1	-1	-1		-1	-1	-1	-1		-1	-1	-1	-1		0.589662	-1	-1	-1		Tb927.8.5730	XX	XX	XX	XX	XX		XX	XX	XX	XX
Tb927.8.5950		0.833333	0.799373	0.623165	0.423289		1.51978	0.805643	0.601266	0.345312		-1	0.723176	0.869359	1.05267		-1	0.407512	0.758025	0.454663		Tb927.8.5950				XX			XX	*
Tb927.8.6490		1.17598	1.38268	1.02804	1.1531		0.771844	1.16777	1.10327	1.08285		1.28121	1.4404	1.353	1.25012		0.945556	1.44224	1.52846	1.72381		Tb927.8.6490
Tb927.8.6810		0.976955	1.12779	1.02519	1.00284		1.00131	1.16009	1.07605	1.0489		1.39294	1.62793	1.36304	1.39735		1.12148	1.37356	1.43194	1.31346		Tb927.8.6810
Tb927.8.7110		0.837252	0.943268	1.19377	1.03701		1.12974	1.22227	1.06957	1.41286		1.16873	1.26087	1.73264	1.11655		1.10985	1.46241	1.36225	1.9816		Tb927.8.7110										*
Tb927.8.7450		-1	0.91977	-1	-1		-1	-1	0.610687	-1		-1	-1	-1	0.655462		-1	-1	-1	-1		Tb927.8.7450	XX	XX	XX	XX	XX		XX	XX	XX	XX
Tb927.8.870		0.824896	1.06883	0.626579	0.466763		0.73268	0.795125	0.392788	0.320609		1.16422	1.13515	0.631339	0.528533		0.868409	0.743367	0.487204	0.370878		Tb927.8.870
Tb927.9.10040		0.714254	0.862458	0.788665	1.03586		1.32081	1.02658	1.00375	1.03137		1.10179	1.11735	0.802097	0.483611		1.56676	1.0997	0.890739	0.5726		Tb927.9.10040
Tb927.9.10920		0.585787	1.44094	1.25926	0.788462		0.944885	1.40157	0.990741	0.817308		0.477829	0.0792146	0.0334975	0.03737		0.424102	0.101251	0.022834	0.0229537		Tb927.9.10920								*	*	*
Tb927.9.11100/9.11030		0.591469	1.26411	0.984504	2.67692		1.15533	1.34476	1.29136	1.35625		0.397706	0.205436	0.0892734	0.191841		0.5	0.214538	0.107039	0.090406		Tb927.9.11100/9.11030								*	*	*
Tb927.9.12400		0.509607	1.68657	0.583622	0.892308		1.40893	1.78507	0.569188	0.530631		1.11356	0.756314	-1	1.39372		0.799858	0.746567	-1	0.673716		Tb927.9.12400	XX	XX		XX			XX	*	*
Tb927.9.12880		0.396405	1.37079	0.814764	1.25		0.905928	1.47177	1.55483	1.0943		0.169792	0.156557	0.0446266	0.0410158		0.442112	0.150723	0.0567839	0.0316576		Tb927.9.12880								*	*	*
Tb927.9.14430		0.562842	2.07194	2.84973	-1		1.32131	1.80576	2.46569	-1		0.440825	0.615057	0.307773	0.0527025		0.844103	0.314931	0.171603	-1		Tb927.9.14430								*	*	*
Tb927.9.1500		0.72437	0.948172	0.69504	0.921722		0.890035	0.791225	0.71409	0.618284		1.04769	1.40689	1.05601	1.19424		1.03716	1.23727	1.46937	1.14504		Tb927.9.1500										*
Tb927.9.1570		0.746795	1.11588	0.966417	1.43812		1.01532	1.22291	1.18203	1.60437		1.09468	1.69107	1.37329	1.44456		0.865477	1.15663	1.37596	1.35123		Tb927.9.1570
Tb927.9.1670		0.640531	1.75621	1.2337	2.04613		1.00542	2.6941	1.6179	1.22368		0.522839	0.226161	0.0863444	0.109934		0.615199	0.402605	0.150233	0.0312193		Tb927.9.1670								*	*	*
Tb927.9.2140		1.14241	0.978599	1.02918	0.968608		1.34901	1.04446	1.21726	1.19467		1.20185	1.05584	1.2829	1.29915		1.12465	1.54676	1.27579	1.38391		Tb927.9.2140					*			*
Tb927.9.2350		0.827226	0.874485	0.98472	0.904321		0.960842	1.19041	1.1517	0.994405		1.04928	1.33683	1.24077	1.23505		1.16771	1.392	1.45097	1.53511		Tb927.9.2350
Tb927.9.3120		0.506583	1.69646	0.998718	0.880299		0.647668	2.12142	1.67308	2.23023		1.45799	1.57693	1.3341	0.902813		0.548151	1.53041	1.43308	1.13596		Tb927.9.3120		XX
Tb927.9.4910		0.757947	1.12178	1.35714	1.06009		1.02271	1.62402	1.83114	2.39655		1.35269	1.48784	2.38505	2.14023		1.25105	2.76248	4.06668	5.15173		Tb927.9.4910
Tb927.9.6560		0.927043	1.06354	1.8125	2.10366		0.901761	3.47423	1.13079	0.945946		0.484248	0.0733138	0.12845	0.149403		0.342616	0.240668	0.0201939	0.0540301		Tb927.9.6560		*			*			*	*	*
Tb927.9.9320		0.902065	0.991859	1.07625	0.820826		0.965361	1.04719	1.11999	0.90331		0.992748	1.61424	1.36137	1.06713		1.00703	1.26588	1.50822	1.22707		Tb927.9.9320

## Sheet: Kinome candidates
Gene ID		TM2/TM0(2)	TM2/TM0(3)	TM2/TM0(4)	TM2/TM0(5)	2	TM3/TM0(2)	TM3/TM0(3)	TM3/TM0(4)	TM3/TM0(5)		TM2/CM2(2)	TM2/CM2(3)	TM2/CM2(4)	TM2/CM2(5)		TM3/CM3(2)	TM3/CM3(3)	TM3/CM3(4)	TM3/CM3(5)		Gene ID	tp1	tp2	tp3	tp4	tp5		tp2	tp3	tp4	tp5
non-essential
Tb927.4.5390/8.6930		0.773792	1.02578	0.692138	0.584601		0.758342	0.653803	0.478457	0.35829		1.07787	1.00915	0.900675	0.850136		0.874579	1.01326	0.600516	0.572547		Tb927.4.5390/8.6930
Tb927.11.7010		0.534171	0.877803	0.545872	0.536877		0.785291	0.967963	0.394332	0.372051		1.21891	0.675268	0.535684	0.990634		1.45098	1.04708	0.342602	0.425873		Tb927.11.7010
Tb927.2.2260		0.656901	0.981428	0.841649	0.653151		1.77957	0.895171	0.390928	0.382022		0.789019	1.43947	0.692818	0.720755		1.19077	1.05291	0.50533	0.352411		Tb927.2.2260
Tb927.10.13010		0.984885	0.754779	0.766639	0.723633		1.0597	0.610459	0.357742	0.30102		1.01989	0.958295	0.964813	1.04869		0.944655	0.864964	0.584988	0.529465		Tb927.10.13010
Tb927.8.870		0.824896	1.06883	0.626579	0.466763		0.73268	0.795125	0.392788	0.320609		1.16422	1.13515	0.631339	0.528533		0.868409	0.743367	0.487204	0.370878		Tb927.8.870
Tb927.7.960		0.721528	0.853768	0.61985	0.361055		0.772321	0.708915	0.391429	0.27633		0.721997	0.504036	0.391937	0.161099		0.691761	0.407729	0.229241	0.124937		Tb927.7.960
Tb927.3.3920		0.528761	0.98274	0.879514	0.50807		0.692001	0.848328	0.526993	0.291636		0.927044	0.6509	0.45088	0.288949		1.04228	0.770527	0.356485	0.13584		Tb927.3.3920
Tb927.6.1780		0.787891	1.00483	0.931688	1.01948		0.840358	0.80259	0.788135	0.476816		1.26046	1.21413	1.28621	1.22577		1.16051	1.02782	0.907504	0.702947		Tb927.6.1780
essential
Tb927.6.2030		0.199697	0.871315	1.97232	1.04982		0.905696	0.858844	0.79588	0.403315		0.75	1.32515	1.10046	1.5261		0.82906	1.19013	0.429837	-1		Tb927.6.2030								*		*
Tb927.3.4560		0.672711	0.758523	0.805233	0.723343		1.07233	0.763636	0.815771	0.315041		0.966942	1.11157	0.649219	0.660194		1.09653	0.853276	1.43579	0.193992		Tb927.3.4560			*							*
Tb927.6.3110		0.571895	0.722745	0.724841	1.01505		1.03813	0.588627	0.638957	0.350993		0.793942	0.568185	0.293619	0.312976		0.724723	0.394046	0.287266	0.0804548		Tb927.6.3110										*
Tb927.11.1180		0.763097	0.884253	1.00491	0.554813		0.880473	0.756453	0.729529	0.181818		0.83901	0.517913	0.291163	0.239325		0.896736	0.398599	0.156425	0.0508809		Tb927.11.1180										*
Tb927.10.14300		0.835706	0.866479	0.405058	0.188287		0.855801	0.95821	0.39163	0.0809167		0.917657	0.545989	0.163477	0.085445		0.810837	0.576526	0.163153	0.0250701		Tb927.10.14300										*
Tb927.1.1930		0.721984	0.535457	0.391244	0.409664		0.850116	0.298168	0.291174	0.198529		0.499775	0.278917	0.110479	0.114035		0.448919	0.167077	0.0952662	0.0489384		Tb927.1.1930								*		*
Tb927.11.14680		0.665956	0.948436	0.9	0.385224		1.01598	1.28273	0.753394	0.430079		0.872532	0.168622	0.0461366	0.031665		0.67065	0.170135	0.0343866	0.0206237		Tb927.11.14680									*	*
Tb927.2.1820		0.898556	0.659373	0.820635	0.256757		1.27512	1.02948	1.2549	0.472949		0.76891	0.431381	0.113952	0.0364327		0.73765	0.424443	0.130293	0.0758679		Tb927.2.1820								*	*	*
Tb927.10.2040		0.972716	0.423563	0.421836	-1		1.48311	2.31767	0.36193	-1		0.573445	0.113167	0.0816131	0.160237		0.646193	0.479871	0.111974	-1		Tb927.10.2040								*	*	*
Tb927.10.5140		1.33616	-1	-1	-1		1.45904	-1	-1	2.03798		0.238411	-1	0.0565075	-1		0.262164	-1	-1	0.0919037		Tb927.10.5140								*	XX	XX
Tb927.11.12410		0.918633	-1	-1	-1		1.19358	-1	-1	-1		0.42756	-1	-1	-1		0.484047	-1	-1	-1		Tb927.11.12410								*	XX	XX
Tb927.5.790/5.800		0.889086	-1	-1	-1		0.681095	-1	-1	-1		0.595159	0.0567239	-1	-1		0.325591	0.22119	0.0436472	-1		Tb927.5.790/5.800								*	XX	XX
Tb927.4.5180/8.7220		0.611413	-1	-1	-1		1.27515	-1	-1	-1		0.334764	-1	-1	-1		0.425229	-1	0.0731988	-1		Tb927.4.5180/8.7220								*	XX	XX
Tb927.7.6310		-1	-1	-1	-1		-1	-1	-1	-1		-1	-1	-1	-1		-1	-1	-1	-1		Tb927.7.6310				*	*			XX	XX	*
weak evidence
Tb927.8.5950		0.833333	0.799373	0.623165	0.423289		1.51978	0.805643	0.601266	0.345312		-1	0.723176	0.869359	1.05267		-1	0.407512	0.758025	0.454663		Tb927.8.5950				XX			XX	*
Tb927.7.5770		0.504637	0.579306	0.788656	0.277003		1.03505	0.791695	1.09091	0.762963		0.842972	0.255096	0.148974	0.0341129		1.02538	0.316306	0.240736	0.104569		Tb927.7.5770										*
Tb927.11.8220		0.697706	1.36656	-1	1.88362		-1	-1	-1	1.09574		0.185371	0.140984	0.0282017	0.0335074		-1	-1	-1	0.019695		Tb927.11.8220								*	*	XX

## Sheet: Cf kinome-whole genome
		Kinome data												Whole genome data
Gene ID		TM2/TM0(2)	TM2/TM0(3)	TM2/TM0(4)	TM2/TM0(5)		TM3/TM0(2)	TM3/TM0(3)	TM3/TM0(4)	TM3/TM0(5)		Class	Name	Tm/Tc	comment
common to both screens
Tb927.2.1820		0.898556	0.659373	0.820635	0.256757		1.27512	1.02948	1.2549	0.472949		CAMK/CAMKL		#VALUE!	validated
Tb927.3.3920		0.528761	0.98274	0.879514	0.50807		0.692001	0.848328	0.526993	0.291636		Other/AUR	AUK2	0.373057	validated
Tb927.8.5950		0.833333	0.799373	0.623165	0.423289		1.51978	0.805643	0.601266	0.345312		STE		0.30765	single growth curve
Whole genome only
Tb927.2.5230		0.776898	1.10329	0.896285	0.935652		1.01638	1.16005	0.944171	0.893066		CAMK		0.351	inconsistent mapping
Tb927.10.7780		0.979547	1.03391	3.40351	0.769231		1.19071	1.19537	2.01053	1.14773		CMGC/MAPK	KFR1	0.369	validated
Tb927.6.4220		1.0582	0.934528	0.822264	0.895462		1.12852	0.767955	0.573498	0.619147		CMGC/MAPK	MAPK5	0.426	inconsistent mapping
Tb927.9.6560		0.927043	1.06354	1.8125	2.10366		0.901761	3.47423	1.13079	0.945946		Other/NAK		0.495	validated
Tb927.8.5390		0.887175	0.823899	0.945726	0.98976		1.04384	0.877307	0.865133	0.765746		CMGC/CDK	CRK4	0.497	single growth curve; false?
Kinome only non-essential
Tb927.6.1780		0.787891	1.00483	0.931688	1.01948		0.840358	0.80259	0.788135	0.476816		CMGC/MAPK	MAPK4	1.139	single growth curve; false?
Tb927.4.5390/8.6930		0.773792	1.02578	0.692138	0.584601		0.758342	0.653803	0.478457	0.35829		Other/NEK	NRKA	0.717	single growth curve; false?	Tb927.8.6930	Other/NEK	NRKB	1.368
Tb927.11.7010		0.534171	0.877803	0.545872	0.536877		0.785291	0.967963	0.394332	0.372051		Other/CAMKK		0.861	validated? (RNAi not checked)
Tb927.2.2260		0.656901	0.981428	0.841649	0.653151		1.77957	0.895171	0.390928	0.382022		PIKK/ATM	ATM	1.167	repair kinase
Tb927.10.13010		0.984885	0.754779	0.766639	0.723633		1.0597	0.610459	0.357742	0.30102		AGC/PKA	PKAC3	0.73
Tb927.8.870		0.824896	1.06883	0.626579	0.466763		0.73268	0.795125	0.392788	0.320609		CAMK/CAMKL		1.241
Tb927.7.960		0.721528	0.853768	0.61985	0.361055		0.772321	0.708915	0.391429	0.27633		CMGC/SRPK		1.285	validated
Kinome only essential
Tb927.6.2030		0.199697	0.871315	1.97232	1.04982		0.905696	0.858844	0.79588	0.403315		STE/STE11		1.137
Tb927.3.4560		0.672711	0.758523	0.805233	0.723343		1.07233	0.763636	0.815771	0.315041		CAMK/CAMKL		0.657
Tb927.6.3110		0.571895	0.722745	0.724841	1.01505		1.03813	0.588627	0.638957	0.350993		CMGC/CDK	CRK11	0.969	validated
Tb927.11.1180		0.763097	0.884253	1.00491	0.554813		0.880473	0.756453	0.729529	0.181818		CMGC/CDK	CRK6	0.838	validated
Tb927.10.14300		0.835706	0.866479	0.405058	0.188287		0.855801	0.95821	0.39163	0.0809167		STE/STE11		0.628
Tb927.1.1930		0.721984	0.535457	0.391244	0.409664		0.850116	0.298168	0.291174	0.198529		PIKK/FRAP	TOR4	0.744	repair kinase
Tb927.11.14680		0.665956	0.948436	0.9	0.385224		1.01598	1.28273	0.753394	0.430079		PIKK/ATR	ATR	1.875	repair kinase
Tb927.10.2040		0.972716	0.423563	0.421836	-1		1.48311	2.31767	0.36193	-1		STE		0.899
Tb927.10.5140		1.33616	-1	-1	-1		1.45904	-1	-1	2.03798		CMGC/MAPK	MAPK	1.017	validated
Tb927.11.12410		0.918633	-1	-1	-1		1.19358	-1	-1	-1		CMGC/CLK		2.093
Tb927.5.790/5.800		0.889086	-1	-1	-1		0.681095	-1	-1	-1		CK1/CK1	CK1.1	3.418		Tb927.5.800	CK1/CK1	CK1.2	6.532
Tb927.4.5180/8.7220		0.611413	-1	-1	-1		1.27515	-1	-1	-1		Other/TLK	TLK1/2	0.68	validated	Tb927.4.5180	Other/TLK	TLK1	1.15
Tb927.7.6310		-1	-1	-1	-1		-1	-1	-1	-1		Other/PLK	PLK	1.397
Kinome only weak evidence
Tb927.7.5770		0.504637	0.579306	0.788656	0.277003		1.03505	0.791695	1.09091	0.762963		AGC/NDR	pk53	1.25
Tb927.11.8220		0.697706	1.36656	-1	1.88362		-1	-1	-1	1.09574		Other/AUR	AUK1	1.528
